# Supplementary material for: The Impacts of Periconceptional Alcohol on Neonatal Ovaries and Subsequent Adult Fertility in the Rat
Source: MDPI journal article supplement (doi:10.3390/ijms25052471), 2024-02-20
Supplement: s1 [file s1]

**Table S1: Details of primers used for quantitative PCR.** Genes of interest are known regulators of primordial follicle growth, survival or activation/recruitment. Ten potential endogenous control genes were also tested, with only *Hprt* able to be used in analyses (all other candidates were regulated by ethanol treatment). All primer assays were Assay-on-Demand primer/prober sets (Thermo Fisher Scientific, Waltham, MA, USA).

| Gene name                                              | Gene symbol   | Assay ID                   | Amplicon size (bp) | Accession number(s)                             |
|--------------------------------------------------------|---------------|----------------------------|--------------------|-------------------------------------------------|
| <b><i>Genes of interest</i></b>                        |               |                            |                    |                                                 |
| BCL2 associated X, apoptosis regulator                 | <i>Bax</i>    | Rn01480161_g1              | 63                 | NM_017059.2                                     |
| BCL2 antagonist/killer 1                               | <i>Bak1</i>   | Rn00587491_m1              | 64                 | NM_053812.1<br>XM_006256101.2                   |
| BCL2 apoptosis regulator                               | <i>Bcl2</i>   | Rn99999125_m1              | 104                | NM_016993.1                                     |
| BCL2 like 1                                            | <i>Bcl2l1</i> | Rn00437783_m1              | 65                 | NM_001033670.1<br>XM_006235265.2                |
| BCL2 binding component3                                | <i>Bbc3</i>   | Rn00597992_m1              | 62                 | NM_173837.2                                     |
| Anti-mullerian hormone                                 | <i>Amh</i>    | Rn00563731_g1              | 92                 | NM_037034.1                                     |
| Phosphatase and tensin homolog                         | <i>Pten</i>   | Rn00477208_m1              | 73                 | NM_0361606.1                                    |
| Serine/threonine kinase 11                             | <i>Stk11</i>  | Rn01535544_m1              | 59                 | NM001108069.1<br>XM_006240910.1                 |
| Inhibin subunit alpha                                  | <i>Inha</i>   | Rn00561423_m1              | 58                 | NM_012590.2                                     |
| C-X-C motif chemokine receptor 4                       | <i>Cxcr4</i>  | Rn00573522_s1              | 58                 | NM_022205.3                                     |
| C-X-C motif chemokine ligand 12                        | <i>Cxcl12</i> | Rn00573260_m1              | 60                 | NM_001033882.1<br>NM_001033883.1<br>NM_022177.3 |
| <b><i>Putative endogenous control genes</i></b>        |               |                            |                    |                                                 |
| Hypoxanthine phosphoribosyltransferase 1               | <i>Hprt1</i>  | Rn01527840_m1              | 64                 | NM_012583.2                                     |
| Actin beta                                             | <i>Actb</i>   | Rn00667869_m1              | 91                 | NM_031144.3                                     |
| Ribosomal protein L13                                  | <i>Rpl13</i>  | Rn00821258_g1              | 68                 | NM_031103.1                                     |
| Ribosomal protein L19                                  | <i>Rpl19</i>  | Rn07318581_g1              | 106                | NM_031103.1                                     |
| Mitochondrial ribosomal protein L1                     | <i>Mrpl1</i>  | Rn01443873_m1              | 169                | NM_001105997.2<br>XM_008770009.1                |
| Phosphoglycerate kinase 1                              | <i>Pgk1</i>   | Rn01474008_gH              | 142                | NM_053291.3                                     |
| Succinate dehydrogenase complex flavoprotein subunit A | <i>SdhA</i>   | Rn00590475_m1              | 59                 | NM_130428.1                                     |
| Peptidylprolyl isomerase A                             | <i>Ppia</i>   | Rn00690933_m1              | 149                | NM_017101.1                                     |
| Eukaryotic 18S ribosomal RNA                           | <i>18S</i>    | Hs99999901_s1 <sup>a</sup> | 187                | X03205.1                                        |

<sup>a</sup> usable in rat samples.
